# Supplementary material for: Alcohol use is associated with affective and interoceptive network alterations in bipolar disorder
Source: PubMed Central journal article supplement (PMC9847622; doi:10.1002/brb3.2832), 2022-11-30
Supplement: BRB3-13-e2832-s003.pdf [file BRB3-13-e2832-s003.pdf]

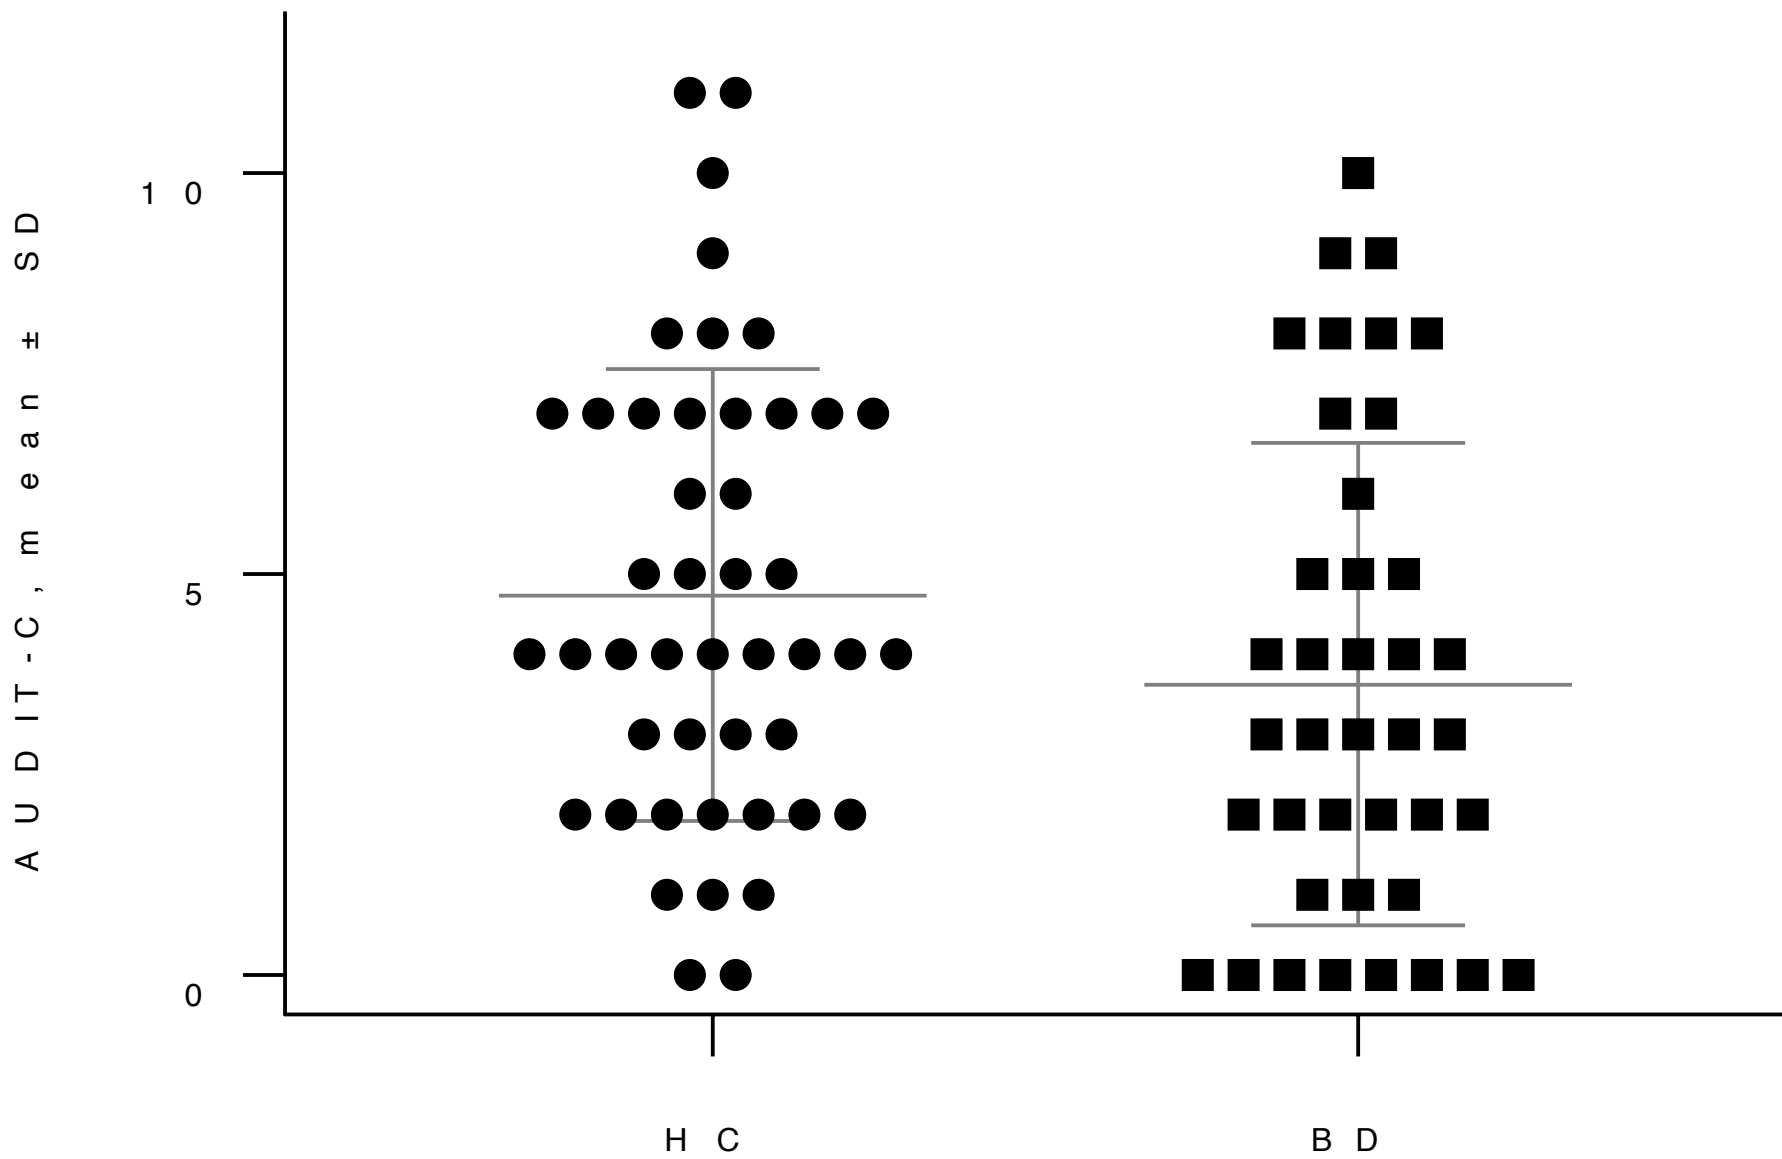

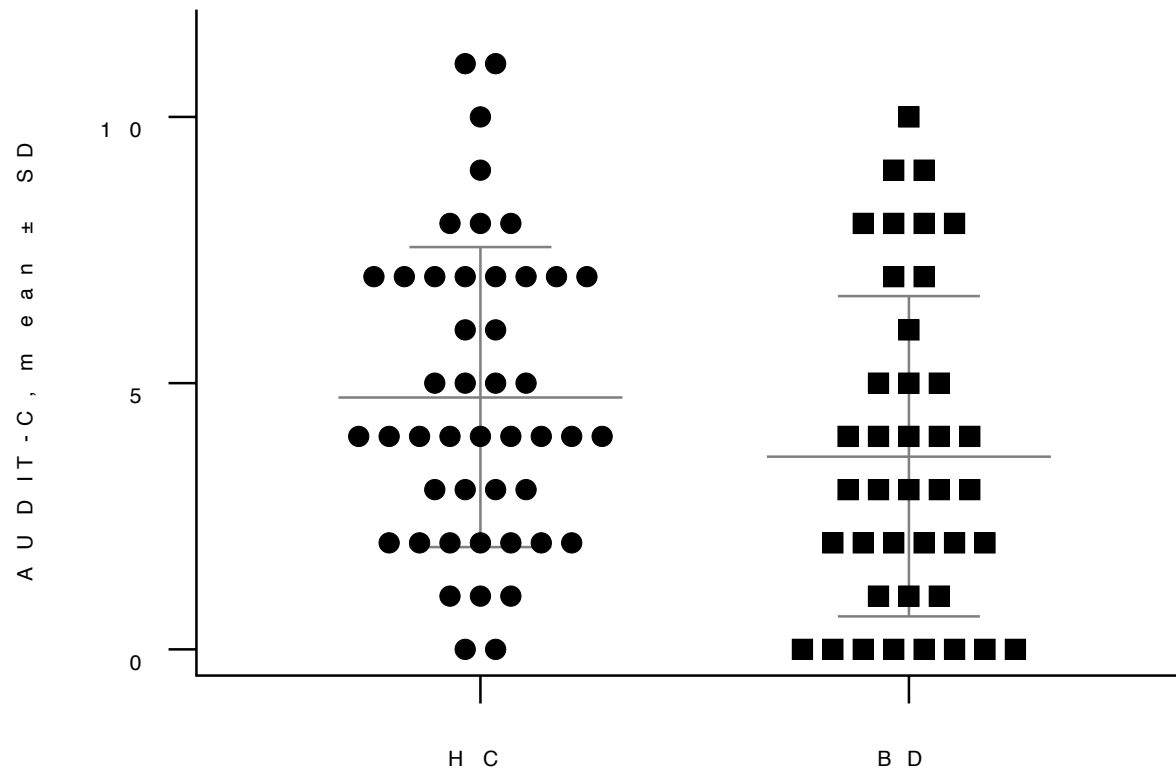

|                                                    | Healthy controls<br>n=46                                       | Bipolar participants<br>n=40                                  | Statistical comparison<br>Test statistic, <i>p</i> |
|----------------------------------------------------|----------------------------------------------------------------|---------------------------------------------------------------|----------------------------------------------------|
| AUDIT-C (mean±SD)                                  | 4.74±2.81                                                      | 3.63±3                                                        | U=713.5, <i>p</i> = 0.072                          |
| Positive for hazardous drinking (n,%) <sup>†</sup> | 21 (46)                                                        | 14 (35)                                                       | $\chi^2=1.548$ , <i>p</i> = 0.316                  |
| Frequency of binge (n) <sup>‡</sup>                | Never: 15<br>Less than Monthly: 16<br>Monthly: 5<br>Weekly: 10 | Never: 19<br>Less than Monthly: 11<br>Monthly: 5<br>Weekly: 5 | $\chi^2=2.658$ , <i>p</i> = 0.447                  |

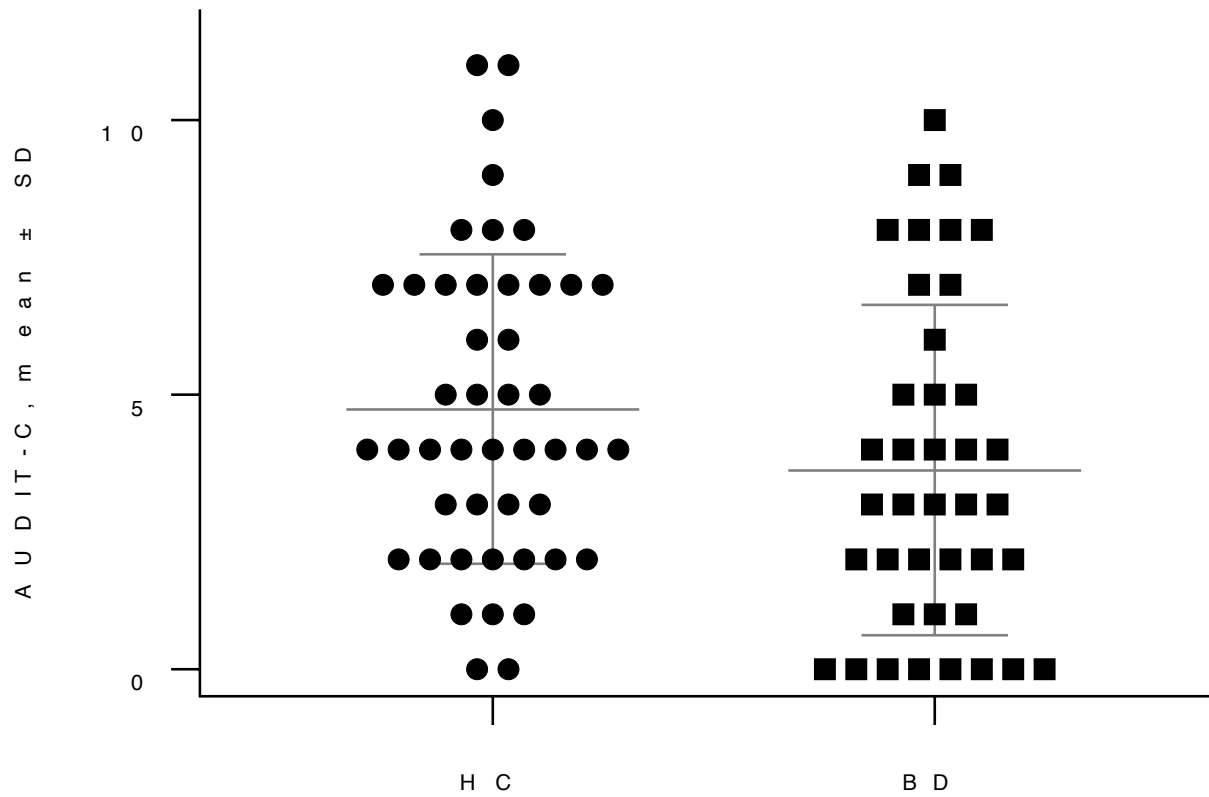

|                                                    | Healthy controls<br>n=46                                       | Bipolar participants<br>n=40                                  | Statistical comparison<br>Test statistic, <i>p</i> |
|----------------------------------------------------|----------------------------------------------------------------|---------------------------------------------------------------|----------------------------------------------------|
| AUDIT-C (mean±SD)                                  | 4.74±2.81                                                      | 3.63±3.01                                                     | U=713.5, <i>p</i> = 0.072                          |
| Positive for hazardous drinking (n,%) <sup>†</sup> | 21 (46)                                                        | 14 (35)                                                       | $\chi^2=1.548$ , <i>p</i> = 0.316                  |
| Frequency of binge (n) <sup>‡</sup>                | Never: 15<br>Less than Monthly: 16<br>Monthly: 5<br>Weekly: 10 | Never: 19<br>Less than Monthly: 11<br>Monthly: 5<br>Weekly: 5 | $\chi^2=2.658$ , <i>p</i> = 0.447                  |
